# Supplementary material
Source: PubMed Central journal article supplement (PMC1948931)

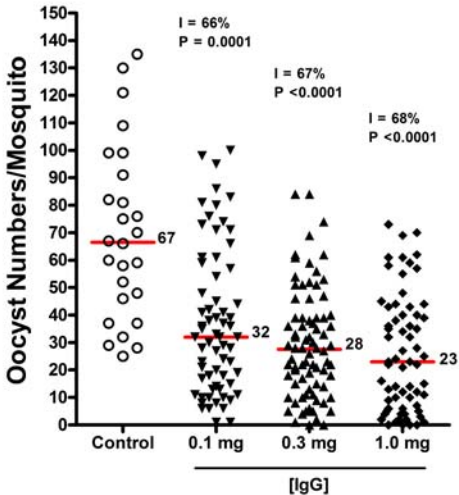

Supplement: pnas_0702239104_2.pdf [file pnas_0702239104_2.pdf]

**a****dsAgAPN1**

0h 48h 72h 96h

*AgAPN1*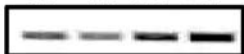

(25)

*AgS7*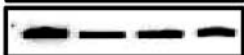

(25)

**b**

CTRL 48h 72h 96h

115.5 -

82.2 -

64.2 -

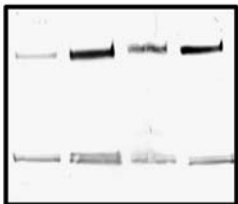**c****dsAgAPN1****CTRL**

72h 96h

96h

72h

96h

115.5 -

82.2 -

64.2 -

48.8 -

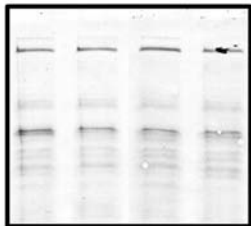

Supplement: pnas_0702239104_3.pdf [file pnas_0702239104_3.pdf]
